# Supplementary material for: Global Prevalence of Diabetic Retinopathy in Pediatric Type 2 Diabetes: A Systematic Review and Meta-analysis
Source: PubMed Central journal article supplement (PMC10024209; doi:10.1001/jamanetworkopen.2023.1887), 2023-03-17
Supplement: jamanetwopen-e231887-s002.pdf [file jamanetwopen-e231887-s002.pdf]

## Data Sharing Statement

Cioana. Global Prevalence of Diabetic Retinopathy in Pediatric Type 2 Diabetes. *JAMA Netw Open*. Published March 17, 2023. doi:10.1001/jamanetworkopen.2023.1887

### Data

**Data available:** Yes

**Data types:** Deidentified participant data

**How to access data:** Table 1, supplementary file

**When available:** With publication

### Supporting Documents

**Document types:** None

### Additional Information

**Who can access the data:** all data will be published with manuscript

**Types of analyses:** for any purpose

**Mechanisms of data availability:** all data will be published with manuscript
